# Supplementary material for: Flower visitation by hoverflies (Diptera: Syrphidae) in a temperate plant-pollinator network
Source: PeerJ. 2018 Dec 3;6:e6025. doi: 10.7717/peerj.6025 (PMC6282941; doi:10.7717/peerj.6025)
Supplement: Table S4 — Mean value of plant height and inflorescence size, and flower colour is provided for all plant species visited by hoverflies during our study. [file peerj-06-6025-s005.csv]

plant	height	inflorescence_size	flower_colour
Achillea millefolium	52.11	38.72	white
Aegopodium podagraria	65.20	58.11	white
Agrimonia eupatoria	60.32	42.94	yellow
Allium scorodoprasum	40.00	30.00	purple
Anthericum ramosum	50.00	200.00	white
Anthriscus sylvestris	112.44	51.94	white
Calendula officinalis	50.00	50.00	yellow
Campanula patula	37.45	20.85	purple
Campanula rapunculoides	68.00	72.25	purple
Centaurea jacea	60.00	31.73	purple
Centaurea scabiosa	68.03	42.36	purple
Centaurium erythrea	25.00	18.13	purple
Cirsium arvense	88.33	20.00	purple
Cirsium vulgare	88.33	40.00	purple
Clinopodium vulgare	30.00	30.00	purple
Coronilla varia	29.89	28.78	purple
Daucus carota	78.90	79.03	white
Dracocephalum moldavica	70.00	150.00	purple
Echinops sphaerocephalus	100.00	45.19	purple
Echium vulgare	43.86	144.04	blue
Erigeron annuus	59.66	87.51	white
Fragaria sp	9.25	15.00	white
Galium mollugo	59.54	136.09	white
Galium verum	54.05	206.29	yellow
Genista tinctoria	36.35	70.22	yellow
Gentiana cruciata	30.00	50.00	blue
Helianthemum grandiflorum	28.77	18.25	yellow
Hypericum perforatum	58.66	76.57	yellow
Inula salicina	62.43	39.31	yellow
Knautia arvensis	52.41	34.41	purple
Leontodon autumnalis	30.00	25.58	yellow
Leontodon hispidus	28.55	25.58	yellow
Lotus corniculatus	22.53	21.34	yellow
Malva moschata	53.74	150.00	purple
Medicago lupulina	19.34	5.45	yellow
Melampyrum nemorosum	33.48	25.12	yellow
Myosotis arvensis	25.84	10.00	blue
Origanum vulgare	50.59	48.36	purple
Pastinaca sativa	100.00	79.12	yellow
Pimpinella saxifraga	40.00	60.00	white
Plantago lanceolata	52.98	13.05	white
Plantago media	40.20	22.15	white
Potentilla argentea	27.76	50.00	yellow
Potentilla erecta	30.00	50.00	yellow
Potentilla reptans	19.76	23.59	yellow
Ranunculus bulbosus	24.88	17.02	yellow
Rhinanthus major	30.00	40.00	yellow
Rubus sp	34.32	48.52	white
Salvia verticillata	57.50	106.44	purple
Senecio jacobaea	82.67	89.12	yellow
Stellaria graminea	25.00	50.00	white
Teucrium chamaedrys	25.00	30.00	purple
Thymus sp	12.64	16.39	purple
Trifolium medium	29.36	25.65	purple
Trifolium reptans	15.10	19.39	white
Verbascum chaixii	91.00	175.56	yellow
Veronica teucrium	37.17	28.19	blue
